# Supplementary material for: Chimpanzee-Specific Endogenous Retrovirus Generates Genomic Variations in the Chimpanzee Genome
Source: PubMed Central journal article supplement (PMC4079660; doi:10.1371/journal.pone.0101195), 2014-07-02
Supplement: pone.0101195.s001.pdf [file pone.0101195.s001.pdf]

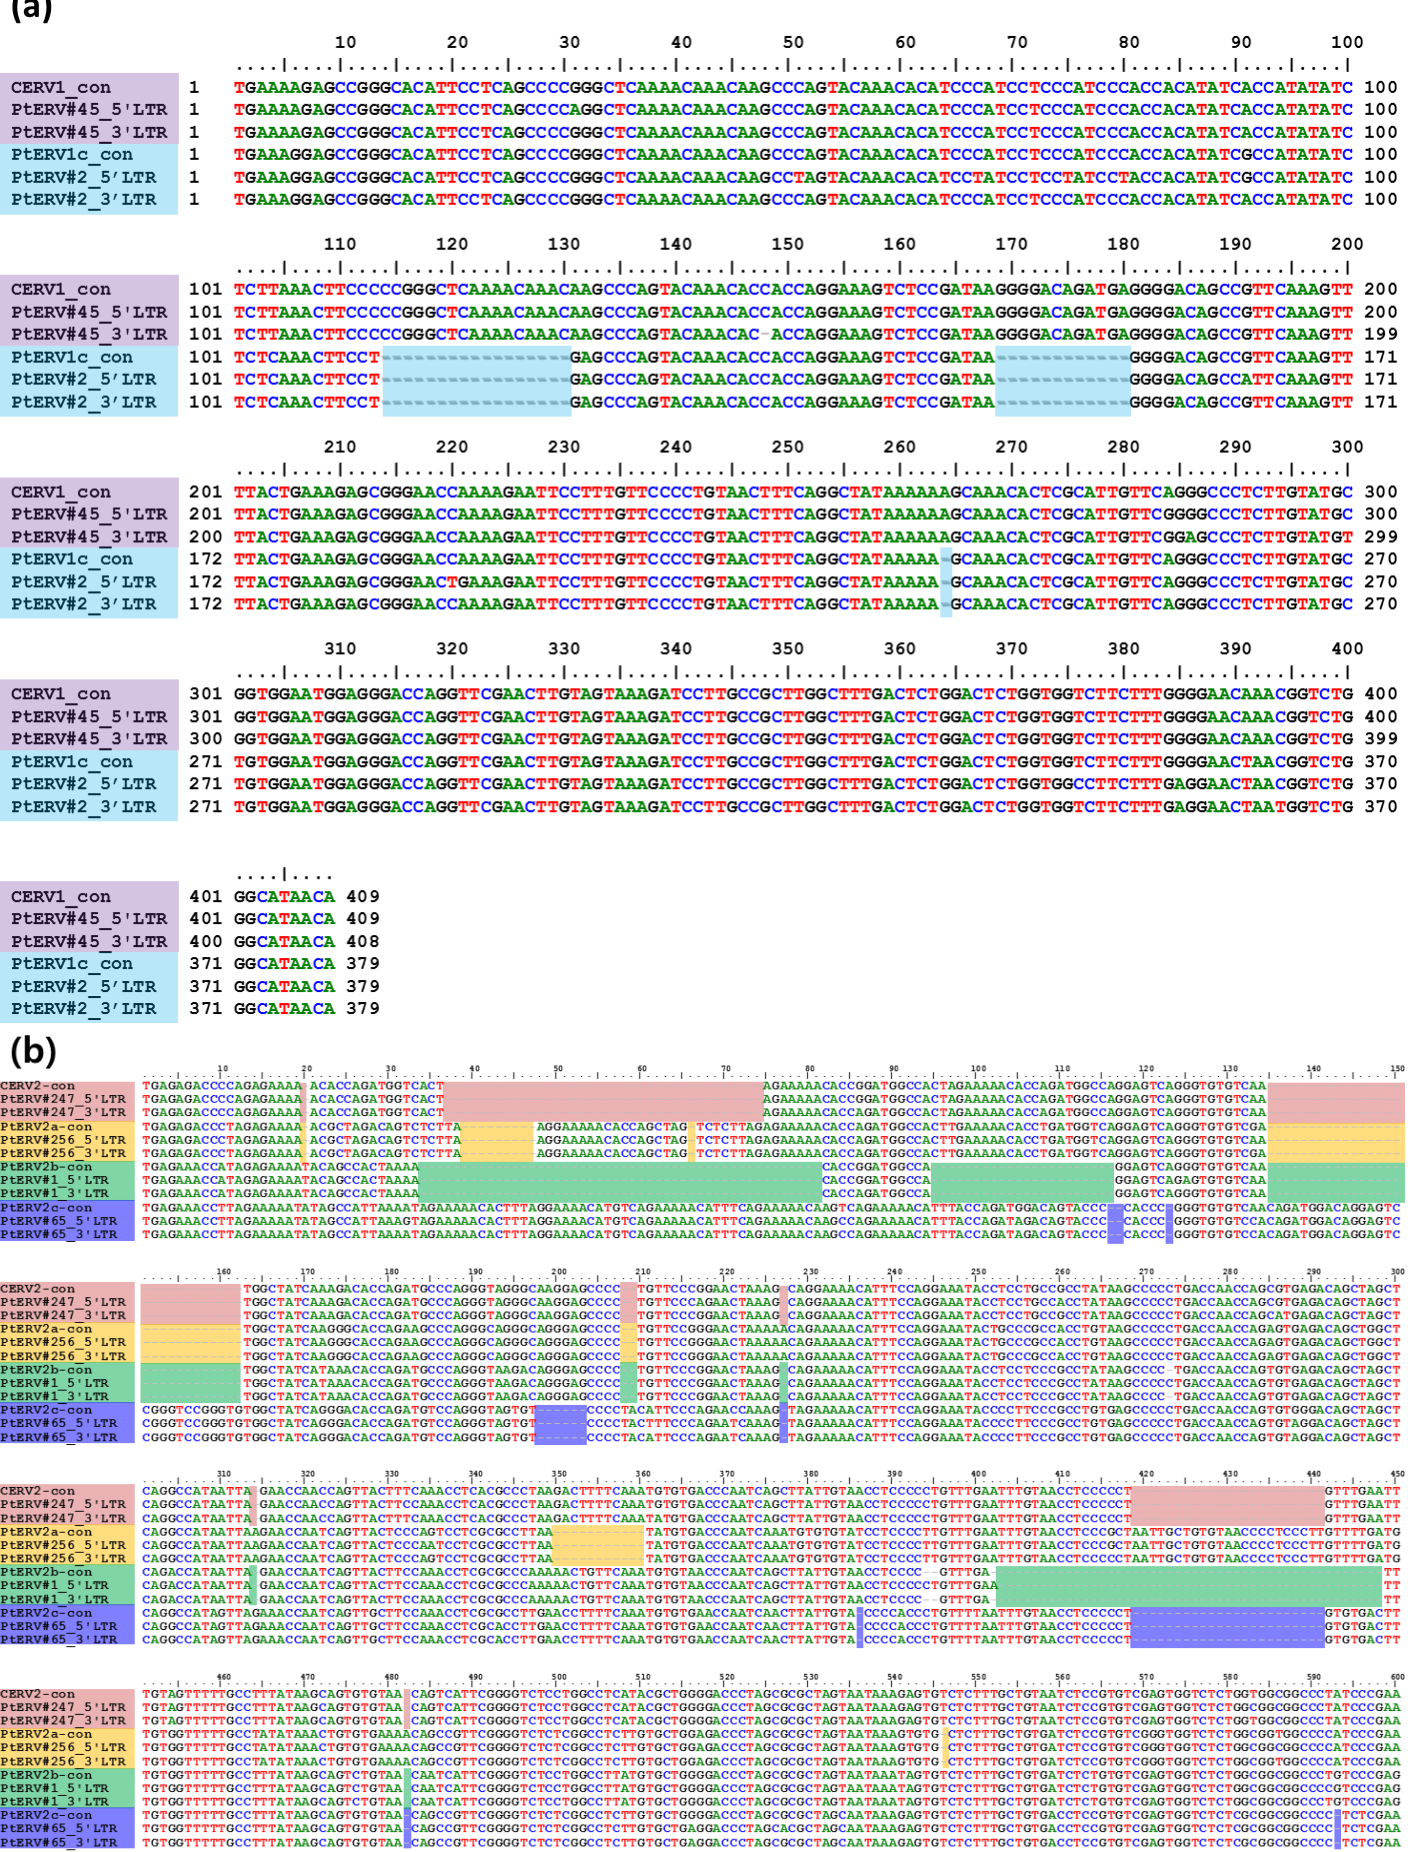

Figure S1. Sequence variants in CERV1 and CERV2 families.
