# Supplementary material for: Chimpanzee-Specific Endogenous Retrovirus Generates Genomic Variations in the Chimpanzee Genome
Source: PubMed Central journal article supplement (PMC4079660; doi:10.1371/journal.pone.0101195), 2014-07-02
Supplement: pone.0101195.s002.pdf [file pone.0101195.s002.pdf]

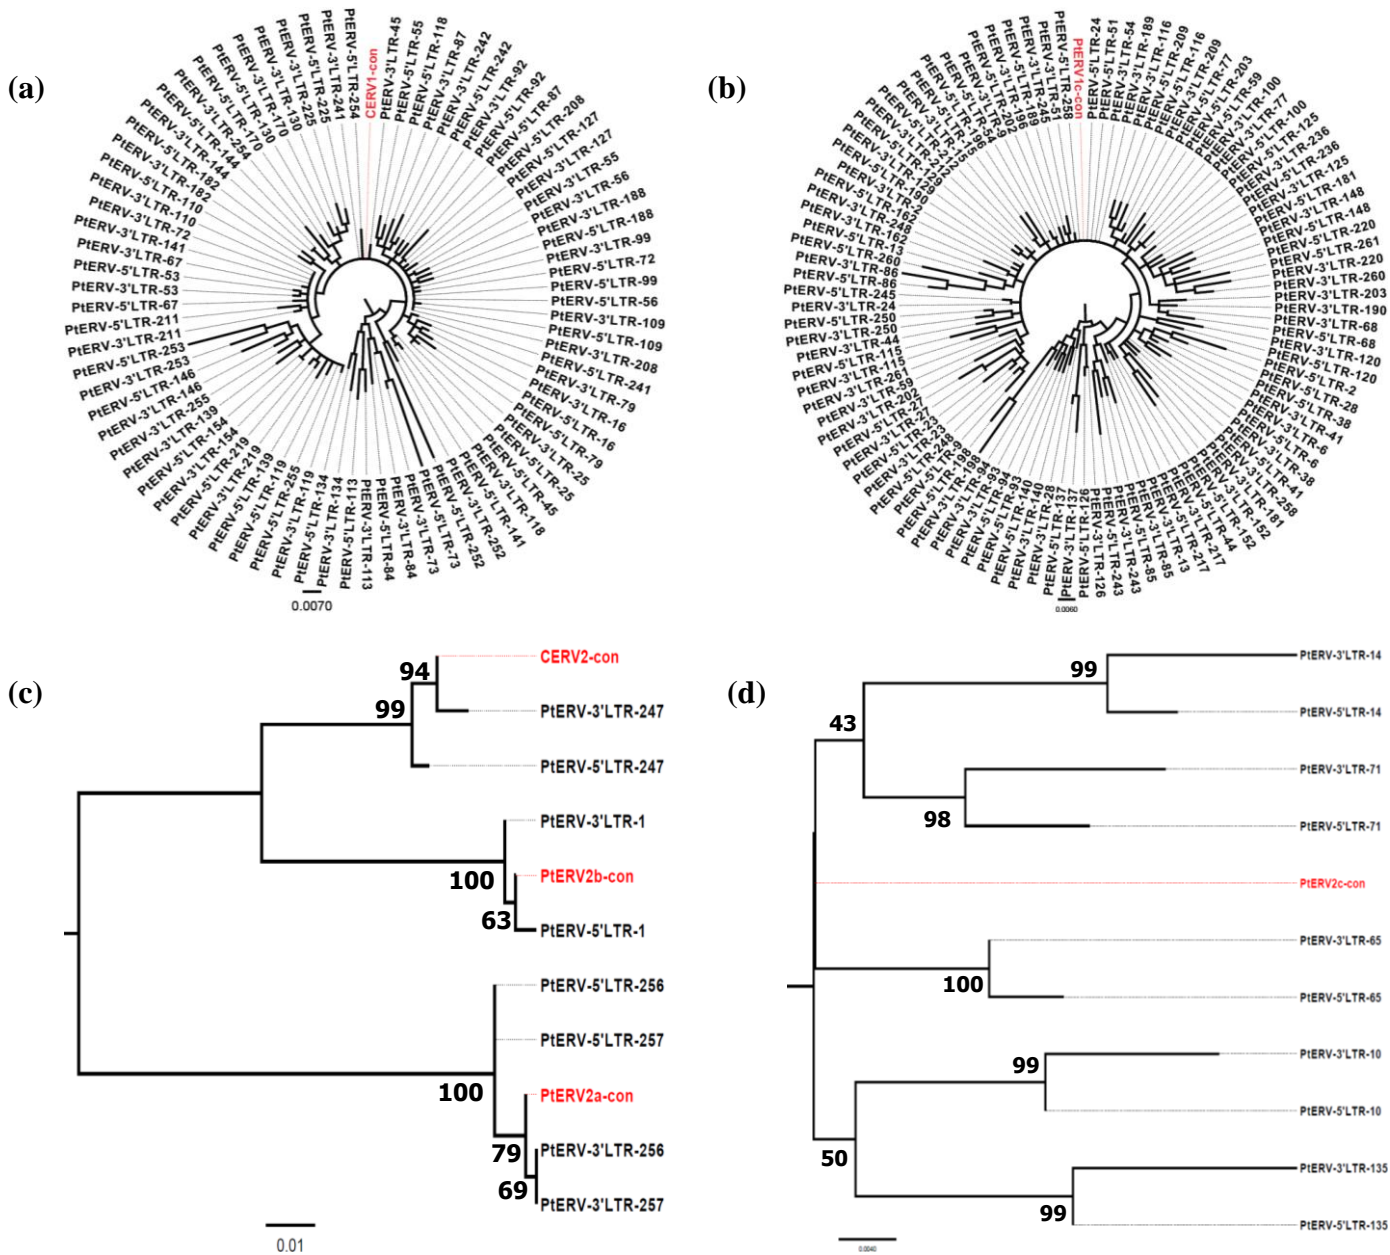

**Figure S2. Maximum likelihood tree of chimpanzee-specific ERV LTR copies.**
