# Supplementary material for: Chimpanzee-Specific Endogenous Retrovirus Generates Genomic Variations in the Chimpanzee Genome
Source: PLoS One. 2014 Jul 2;9(7):e101195. doi: 10.1371/journal.pone.0101195 (PMC4079660; doi:10.1371/journal.pone.0101195)
Supplement: Table S5 — Polymorphism pattern of the 11 polymorphic chimpanzee-specific ERV copies. (XLSX) [file pone.0101195.s009.xlsx]

## Sheet: Sheet1
Table S5. Polymorphism pattern of the 11 polymorphic chimpanzee-specific ERV copies
No.	PtERV	Genomic location	Subfamily	TSD	Size			Type of the polymorphism			Features
					5' UTR	internal region	3' UTR	Chimpanzee-specific ERV	Solitary-LTR	Pre-insertion
1	PtERV6	chr1:125468308-125476683	PtERV-1c	ATAA	377	7621	377	O	O
2	PtERV101	chr8:95303871-95311068	PtERV-1c	GCTG	379	6024	794	O		O
3	PtERV130	chr12:8713323-8719227	CERV1	CAAC	408	5088	408	O	O
4	PtERV144	chr12:72044535-72053687	CERV1	GACT	396	8260	396	O	O
5	PtERV190	chr19:48312517-48321214	PtERV-1c	GCAC	378	7940	379	O		O	rcPtERV
6	PtERV202	chr21:337149-345911	PtERV-1c	ATAG	379	8004	379	O		O	rcPtERV
7	PtERV236	chrX:89913208-89921801	PtERV-1c	GTATT	379	7835	379	O		O
8	Solo37	chr4:61836106-61836515	CERV1	GAGC	409	-	-		O	O
9	Solo124	chr11:71375770-71376149	PtERV-1c	ATAT	379	-	-		O	O
10	Solo48	chr5:35270920-35271487	PtERV-2c	TATTT	566	-	-		O	O
11	Solo83	chr7:53938935-53939429	PtERV-2c	GTTC	511	-	-		O	O
